# Supplementary material for: Acute Changes in Carotid-Femoral Pulse-Wave Velocity Are Tracked by Heart-Femoral Pulse-Wave Velocity
Source: PubMed Central journal article supplement (PMC7854542; doi:10.3389/fcvm.2020.592834), 2021-01-20
Supplement: Data_Sheet_1.pdf [file Data_Sheet_1.pdf]

**SUPPLEMENTAL MATERIAL**

**Table S1:** Arterial path length (D) and pulse-transit time (PTT) values for the calculation of carotid-femoral (cf-) and heart-femoral (hf-) pulse-wave velocity (PWV) variables.

| <b>n=20</b>               | <b>hfD</b> | <b>hfPTT</b> | <b>hfPWV</b> | <b>cfD</b> | <b>cfPTT</b> | <b>cfPWV</b> |
|---------------------------|------------|--------------|--------------|------------|--------------|--------------|
|                           | (mm)       | (ms)         | (m/s)        | (mm)       | (ms)         | (m/s)        |
| <b>Mean</b>               |            |              |              |            |              |              |
| Rest                      | 599        | 203          | 2.97         | 513        | 106          | 4.87         |
| 120 mmHg                  | -          | 210          | 2.87         | -          | 110          | 4.65         |
| <b>Standard Deviation</b> |            |              |              |            |              |              |
| Rest                      | 37         | 15           | 0.24         | 43         | 10           | 0.45         |
| 120 mmHg                  | -          | 14           | 0.20         | -          | 8            | 0.45         |

**FIGURE S1.** Bland-Altman plot for carotid-femoral pulse wave velocity (cfPWV) versus uncorrected heart-femoral pulse wave velocity (hfPWVc) at baseline (A) and during 120mmHg thigh cuff inflation (B), n = 20. Dotted line denotes mean bias. Dashed lines represent bias upper and lower 95% confidence intervals. Solid black line depicts overall linear regression.

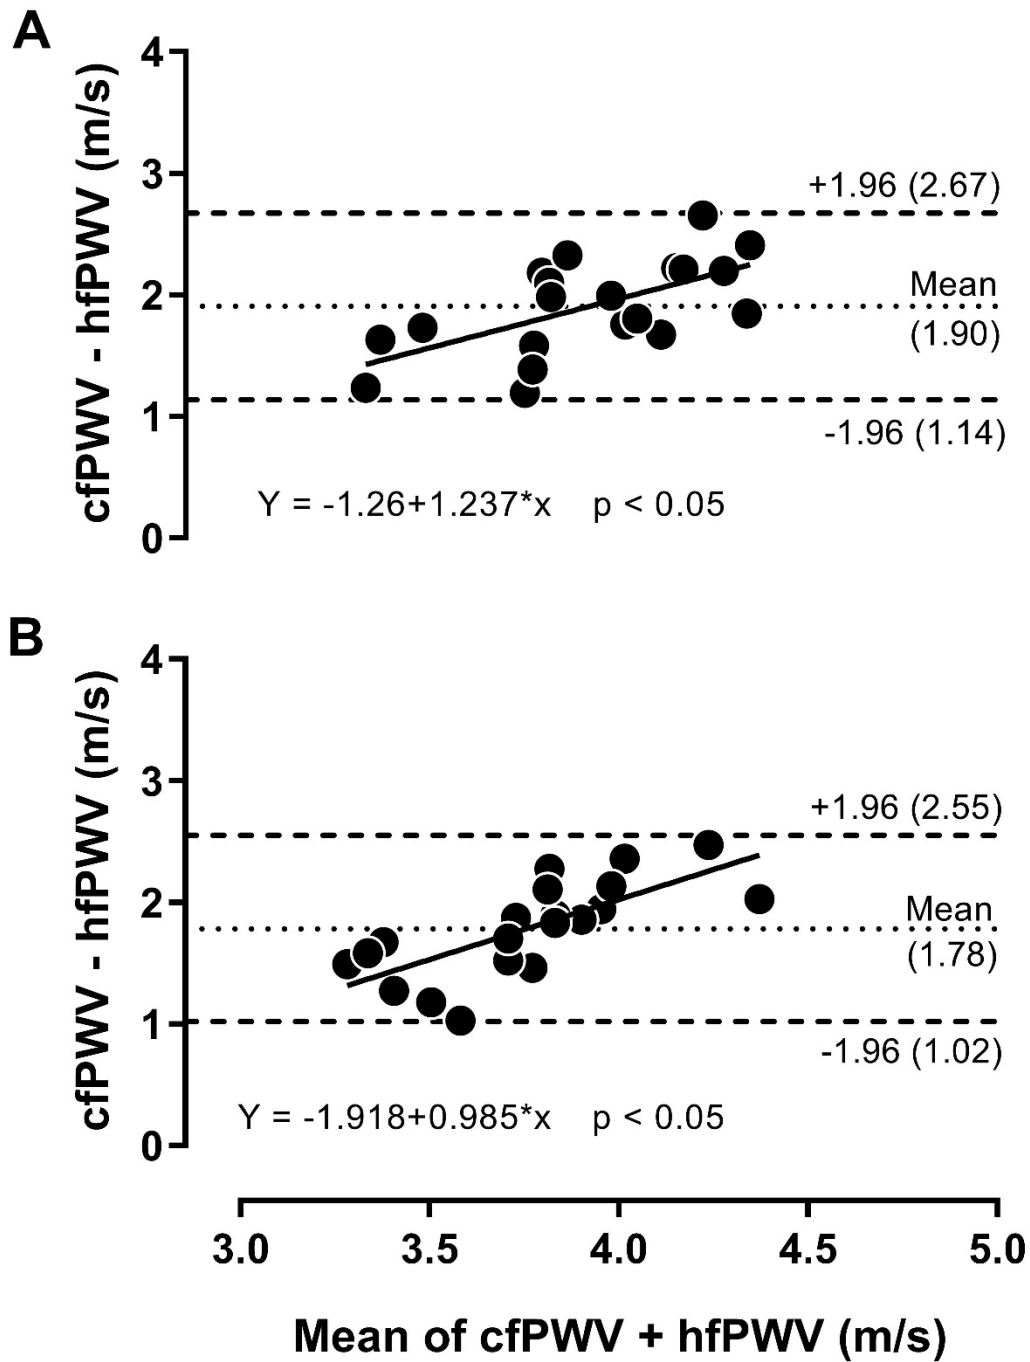

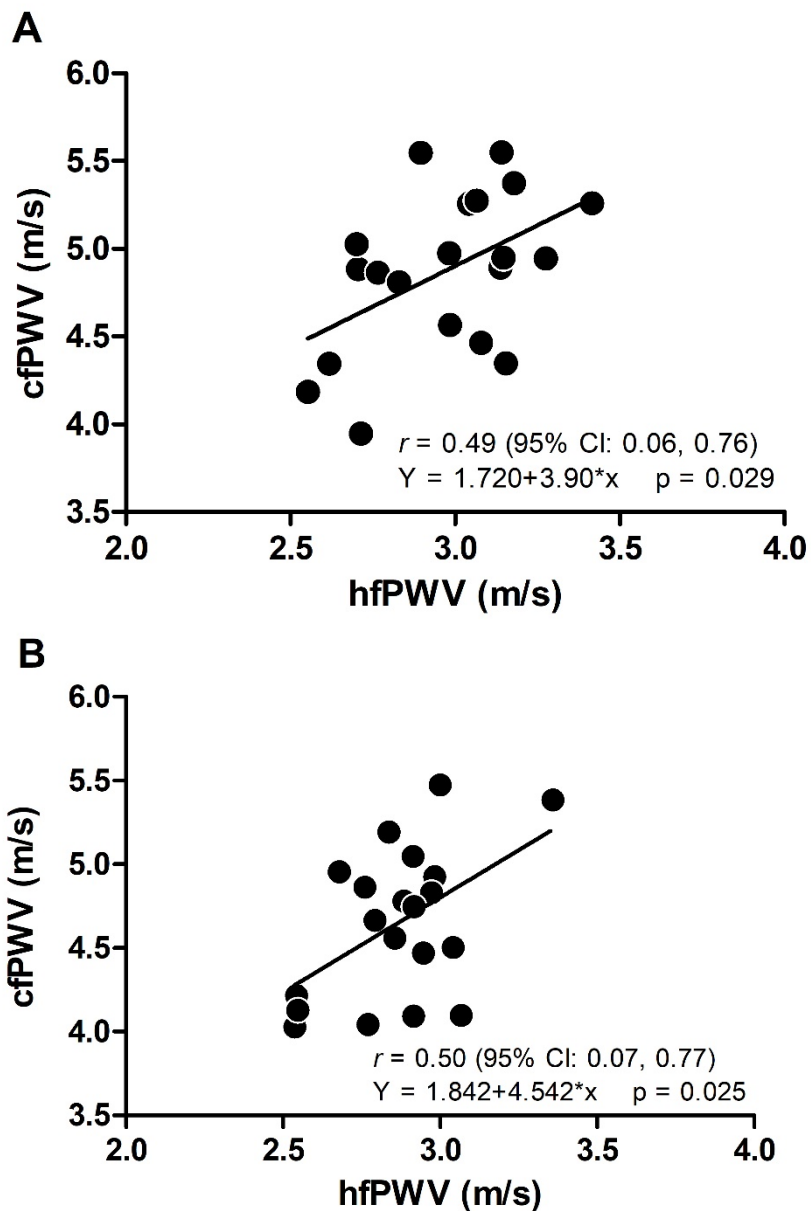

**Figure S2:** Correlations between carotid-femoral pulse wave velocity (cfPWV) and heart-femoral pulse wave velocity (hfPWV) at rest (A) and during 120 mmHg cuff inflation (B), n=20.

**Interpretation:** There were significant moderate ( $r = 0.4-0.7$ ) positive correlations between hfPWV and cfPWV at baseline and during cuff occlusion ( $P < 0.05$ ).

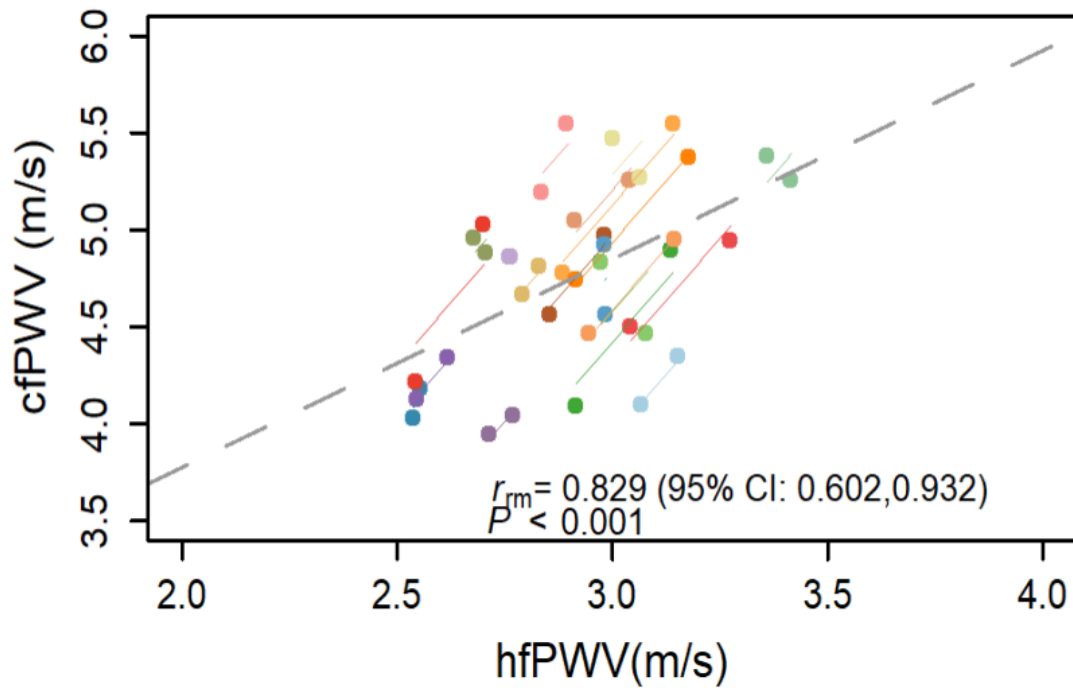

**FIGURE S3.** Repeated measures correlation analysis between carotid-femoral pulse wave velocity (cfPWV) and heart-femoral pulse wave velocity (hfPWV), n=20. **Interpretation:** There was a significant strong ( $r = 0.7- 0.9$ ) positive correlation between hfPWV and cfPWV across conditions ( $P < 0.05$ ).
